# Supplementary material
Source: MDPI journal article supplement (https://www.mdpi.com/1996-1073/15/9/3473)
Supplement: s1 [file s1]

**Table S1.** Characterization of the studied MOFs and their composites.

| MOF or MOF-Composite | Langmuir Surface Area<br>(m <sup>2</sup> /g) | Crystalline lattice parameters (Å)   | V (Å <sup>3</sup> ) |
|----------------------|----------------------------------------------|--------------------------------------|---------------------|
| CuBTC                | -                                            | a, b, c = 26.3152(6)                 | 18223.14(9)         |
| CuBTC-A-15           | 1716.48                                      | a, b, c = 26.3302(1)                 | 18254.19(9)         |
| CuBTC-Mt-15          | -                                            | a, b, c = 26.3341(5)                 | 18262.42(2)         |
| CuBTC-BC-5           | 1502.17                                      | a, b, c = 26.3485(6)                 | 18292.40(9)         |
| CuBTC-BC-15          | 620.32                                       | a, b, c = 26.3131(1)                 | 18218.65(9)         |
| CuBTC-BC-30          | -                                            | a, b, c = 26.3084(1)                 | 18208.91(1)         |
| UTSA-16              | -                                            | a, b = 13.0075(3),<br>c = 30.1528(6) | 5101.74(6)          |
| UTSA-16-Mt-5         | 676.23                                       | a, b = 13.0562(3),<br>c = 30.0278(2) | 5118.69(8)          |
| UTSA-16-Mt-15        | -                                            | a, b = 12.9900(6),<br>c = 30.1602(8) | 5089.29(8)          |
| UTSA-16-Mt-40        | -                                            | a, b = 13.0005(5),<br>c = 30.1834(7) | 5101.44(6)          |
| UiO-66-BTEC          | -                                            | a, b, c = 20.6969(2)                 | 8865.79(4)          |
| UiO-66-BTEC-A-15     | 330.31                                       | a, b, c = 20.7930(8)                 | 8989.94(1)          |
| UiO-66-BTEC-Mt-15    | 543.40                                       | a, b, c = 20.6568(8)                 | 8814.43(9)          |
| UiO-66-BTEC-BC-5     | -                                            | a, b, c = 20.7165(5)                 | 8891.03(9)          |
| UiO-66-BTEC-BC-15    | 567.76                                       | a, b, c = 20.6858(8)                 | 8851.61(1)          |
| UiO-66-BTEC-BC-30    | -                                            | a, b, c = 20.7279(1)                 | 8905.66(2)          |

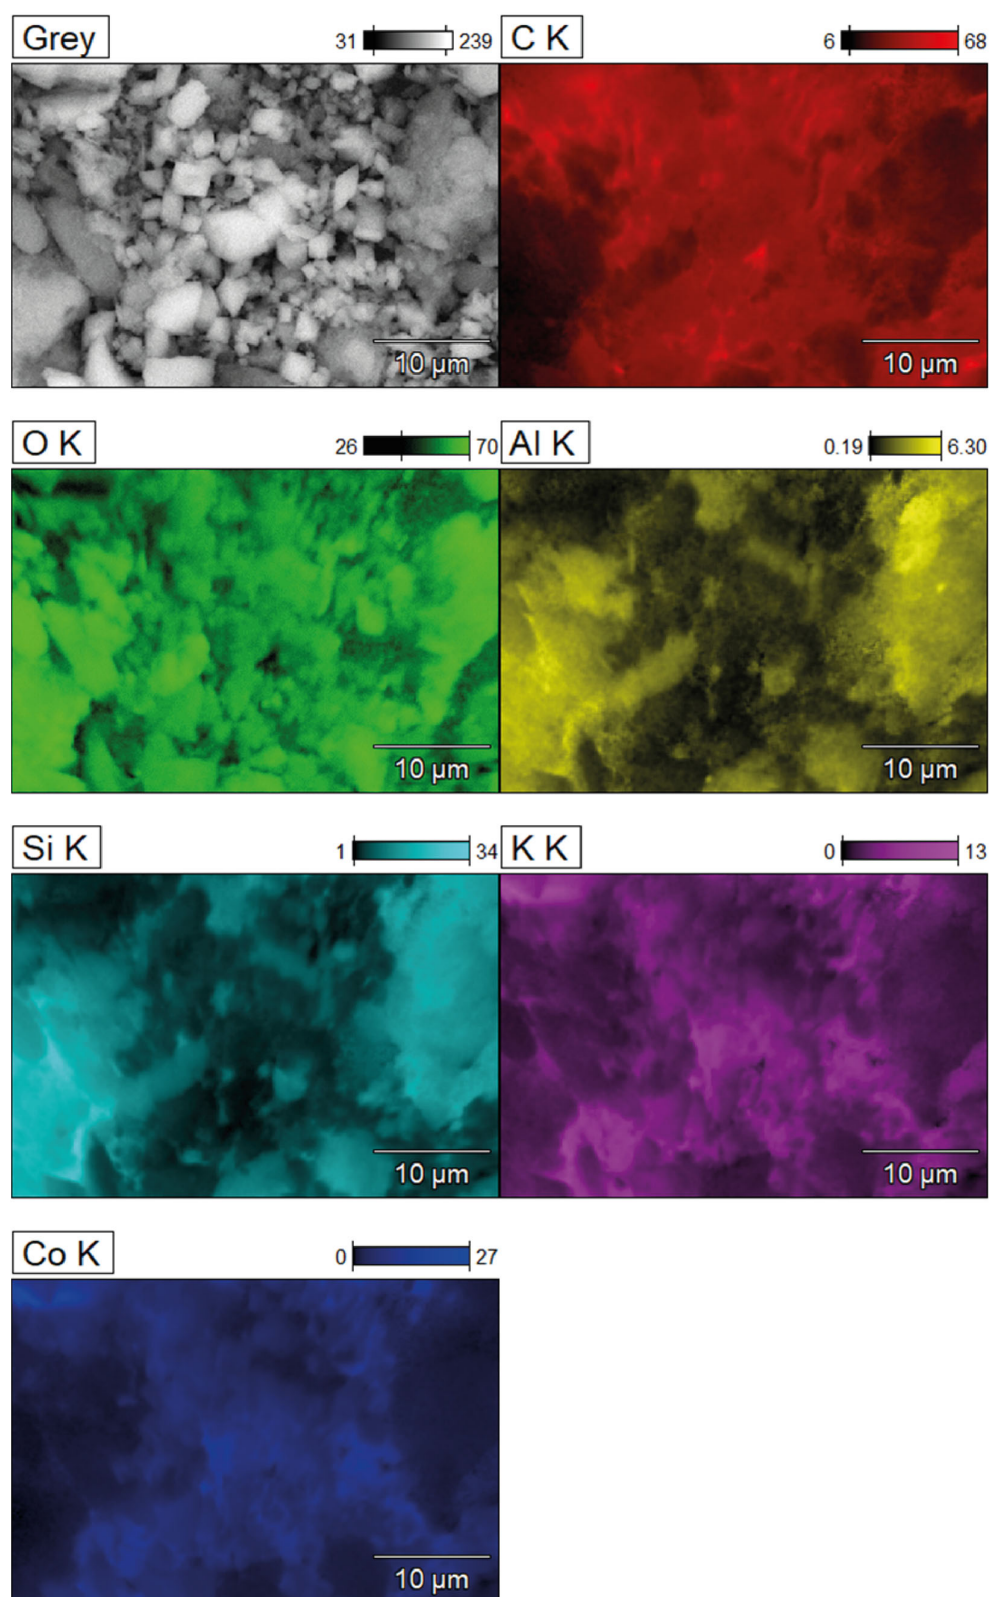

Figure S1: EDS element mapping image of UTSA-16-Mt-15

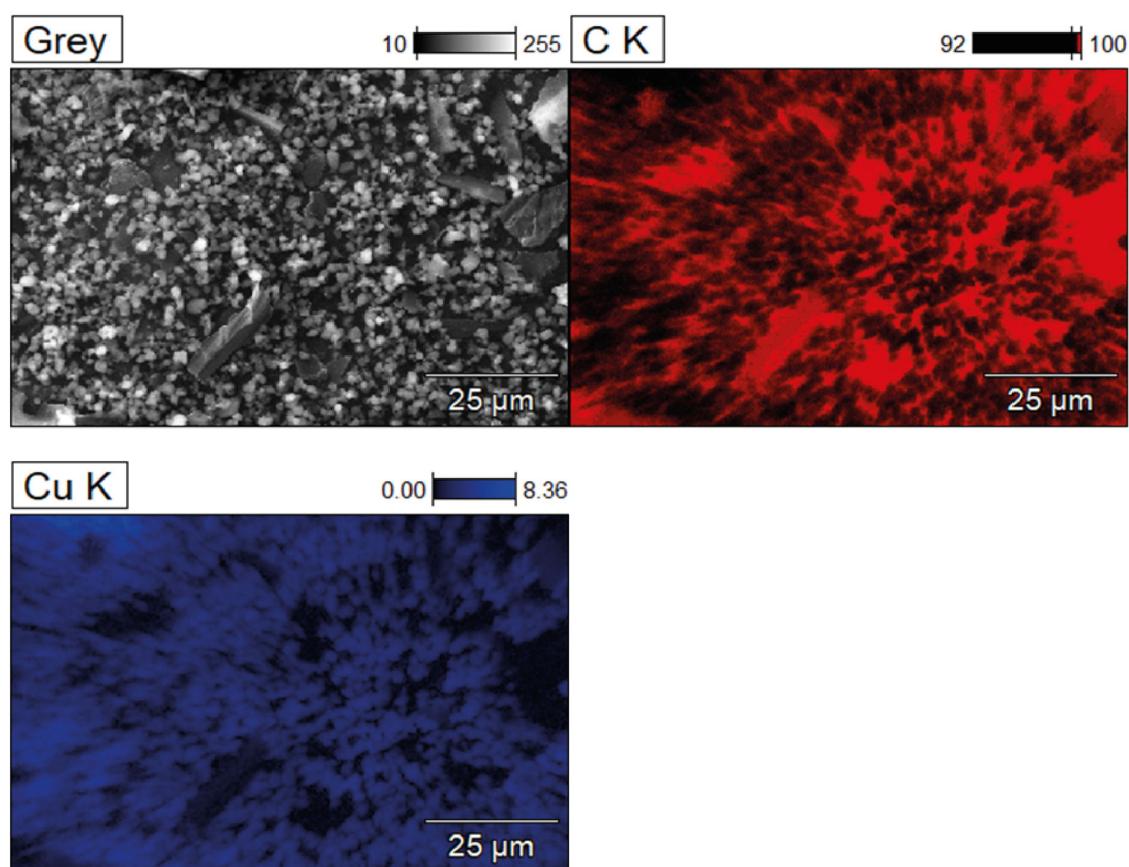

Figure S2. EDS element mapping image of CuBTC-BC-15.

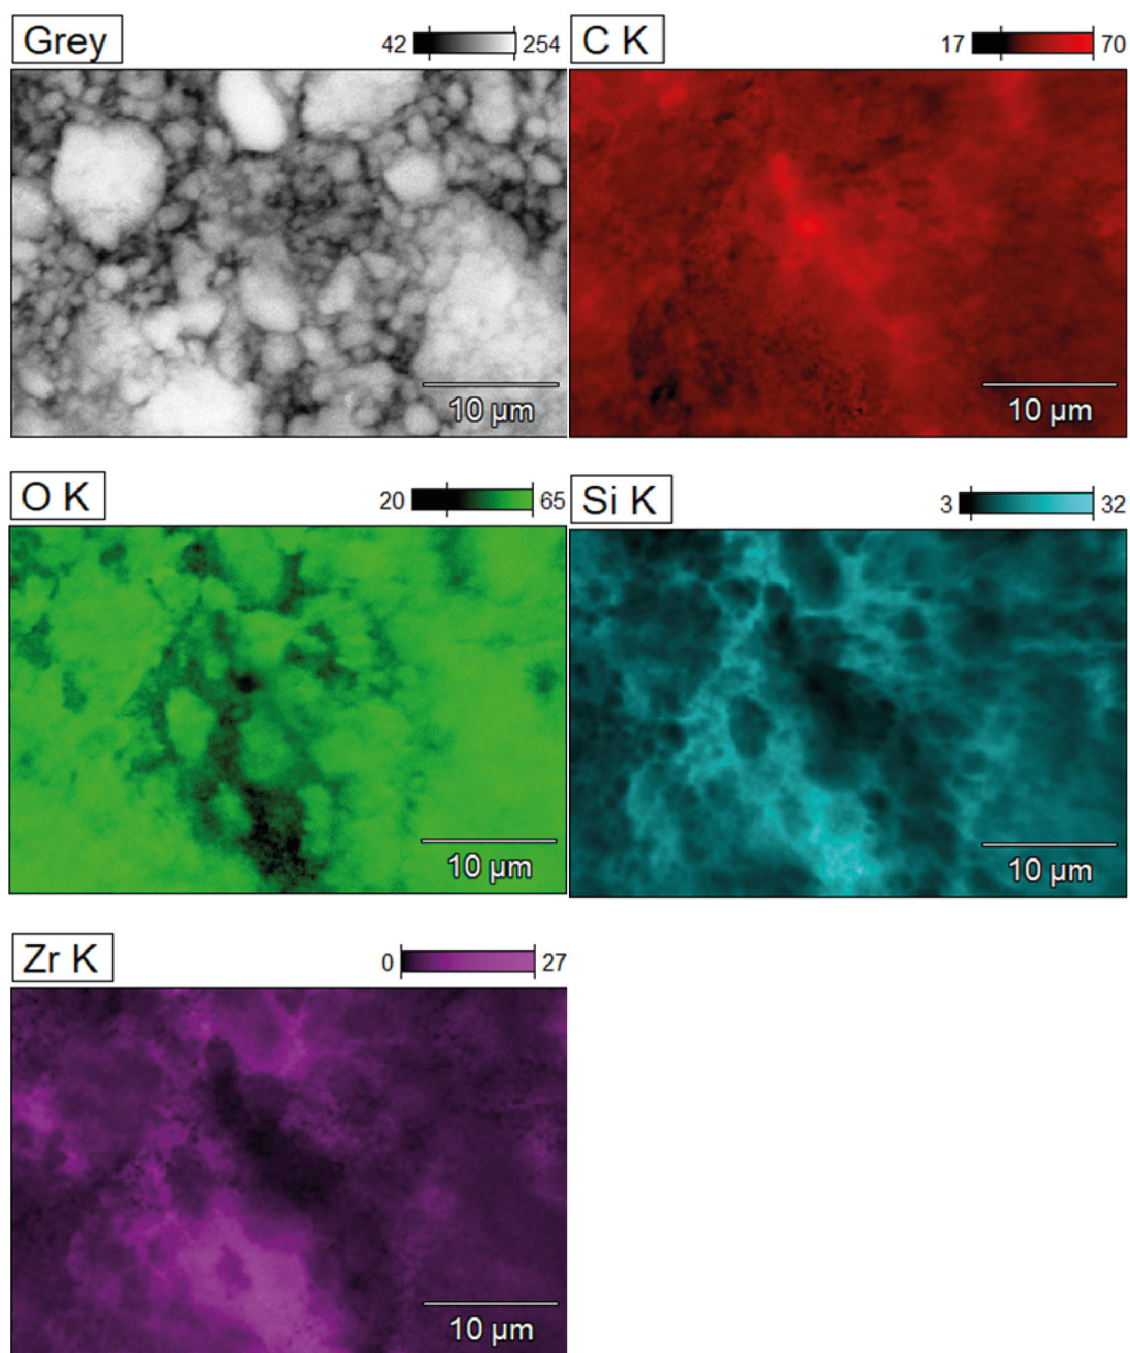

Figure S3. EDS element mapping image of UiO-66-BTEC-A-15.

**Table S2.** Content of the elements in MOFs and their composites.

| MOF or MOF-Composite | C (%)    | Si (%)        | Al (%)      | Cu (%)   | Co (%)     | K (%)        | Zr (%)     |
|----------------------|----------|---------------|-------------|----------|------------|--------------|------------|
| CuBTC                | 43±3     | 0.019±0.007   | -           | 25.5±0.1 | -          | 0.22±0.02    | -          |
| CuBTC-A-15           | 28.4±0.9 | 0.039±0.004   | -           | 27.7±0.5 | -          | -            | -          |
| CuBTC-Mt-15          | 20.5±0.1 | 0.033±0.004   | 2.36±0.09   | 12.0±0.9 | -          | 0.25±0.04    | -          |
| CuBTC-BC-5           | 39.2±0.7 | 0.039±0.008   | -           | 25.8±0.2 | -          | 0.16±0.04    | -          |
| CuBTC-BC-15          | 42±5     | 0.0341±0.0004 | 0.020±0.003 | 20.9±0.2 | -          | 0.36±0.01    | -          |
| CuBTC-BC-30          | 45±1     | 0.049±0.002   | 0.026±0.002 | 19.3±0.1 | -          | 0.24±0.03    | -          |
| UTSA-16              | 19.0±0.4 | -             | -           | -        | 22.2±0.2   | 9.60±0.08    | -          |
| UTSA-16-Mt-5         | 16.2±0.1 | 0.079±0.005   | 0.35±0.03   | -        | 18.73±0.01 | 10.532±0.004 | -          |
| UTSA-16-Mt-15        | 15±1     | 0.070±0.01    | 1.0±0.5     | -        | 14.9±0.9   | 8.2±0.4      | -          |
| UTSA-16-Mt-40        | 12.9±0.8 | 0.058±0.004   | 2.34±0.06   | -        | 10.7±0.3   | 8.35±0.03    | -          |
| UTSA-16-A-15         | 14±2     | 0.032±0.004   | -           | -        | 12±1       | 9.22±0.03    | -          |
| UTSA-16-BC-15        | 29.8±0.3 | 0.08±0.02     | 0.019±0.002 | -        | 17.1±0.6   | 8.6±0.2      | -          |
| UiO-66-BTEC          | 19.8±0.9 | -             | -           | -        | -          | -            | 20.1±0.3   |
| UiO-66-BTEC-A-15     | 21.6±0.3 | 0.053±0.005   | -           | -        | -          | -            | 18.09±0.07 |
| UiO-66-BTEC-Mt-15    | 21.3±0.3 | 0.065±0.004   | 0.31±0.04   | -        | -          | 0.16±0.08    | 18.9±1     |
| UiO-66-BTEC-BC-5     | 29.7±0.5 | 0.058±0.007   | -           | -        | -          | -            | 19.5±0.3   |
| UiO-66-BTEC-BC-15    | 33.4±0.3 | 0.039±0.002   | -           | -        | -          | 0.185±0.004  | 17.5±0.4   |
| UiO-66-BTEC-BC-30    | 39.1±0.9 | 0.091±0.002   | -           | -        | -          | 0.14±0.03    | 14.59±0.07 |

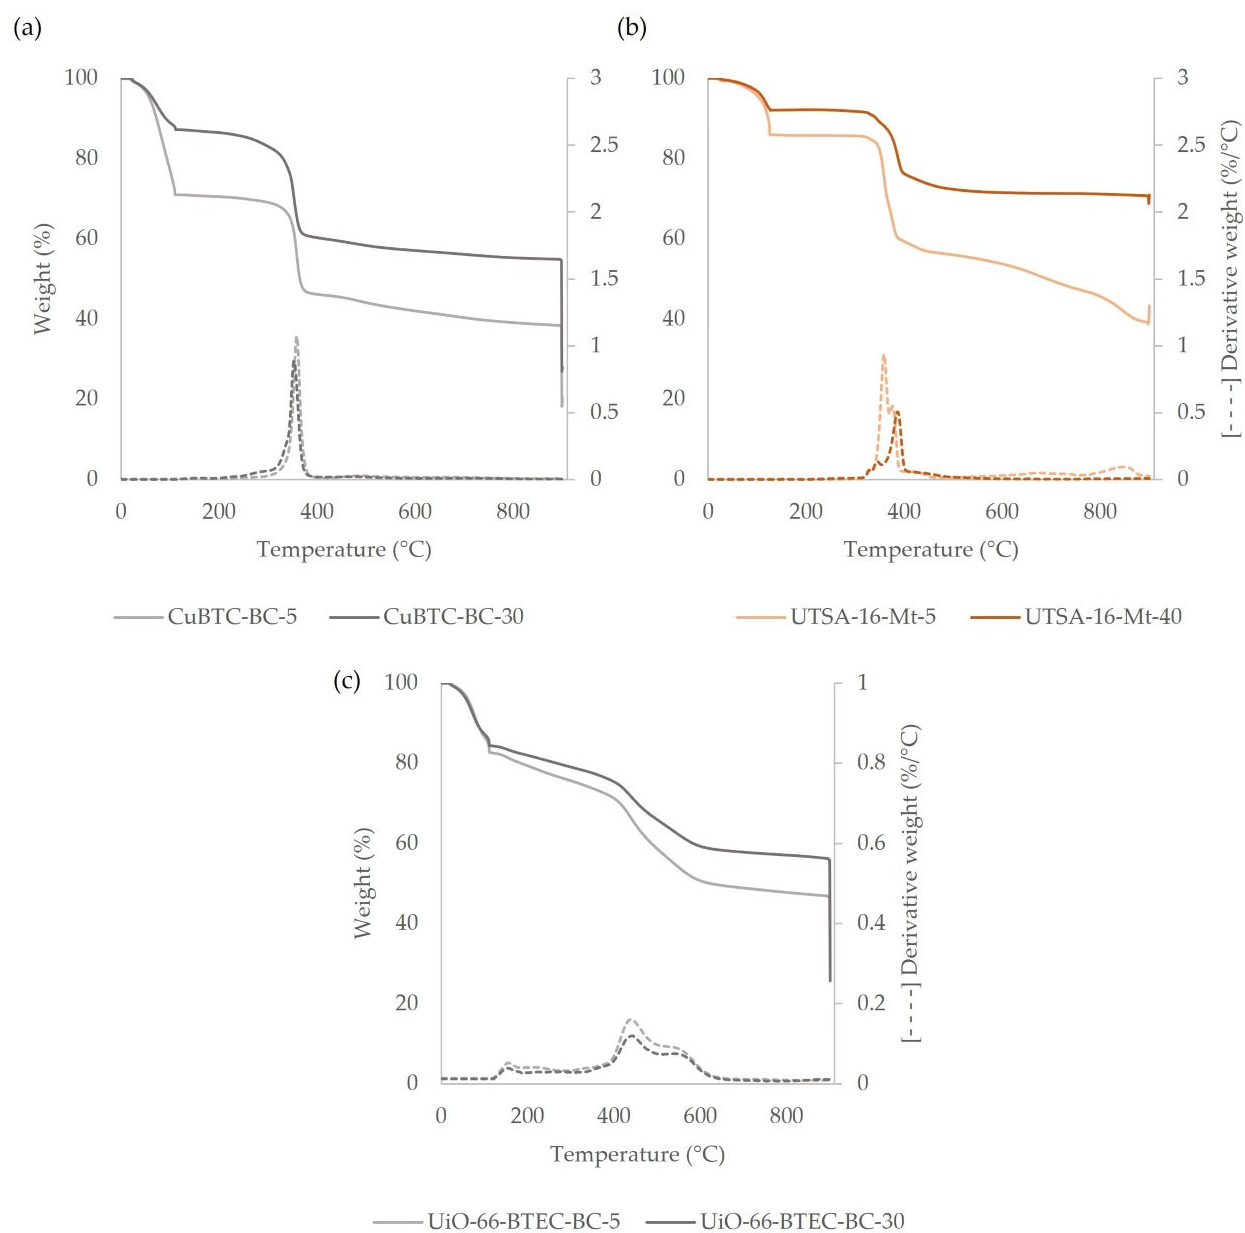

**Figure S4:** Thermogravimetric analysis (TGA) of MOF-composites: a) CuBTC-composites; b) UTSA-16-composites; c) UiO-66-BTEC-composites.



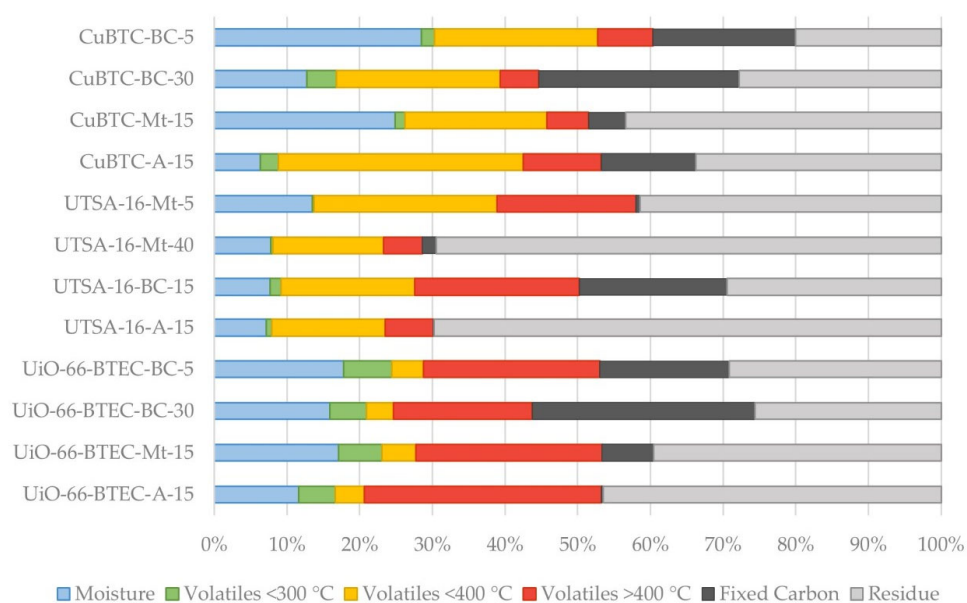

**Figure S5.** Thermal degradation matrix of MOF-composites.

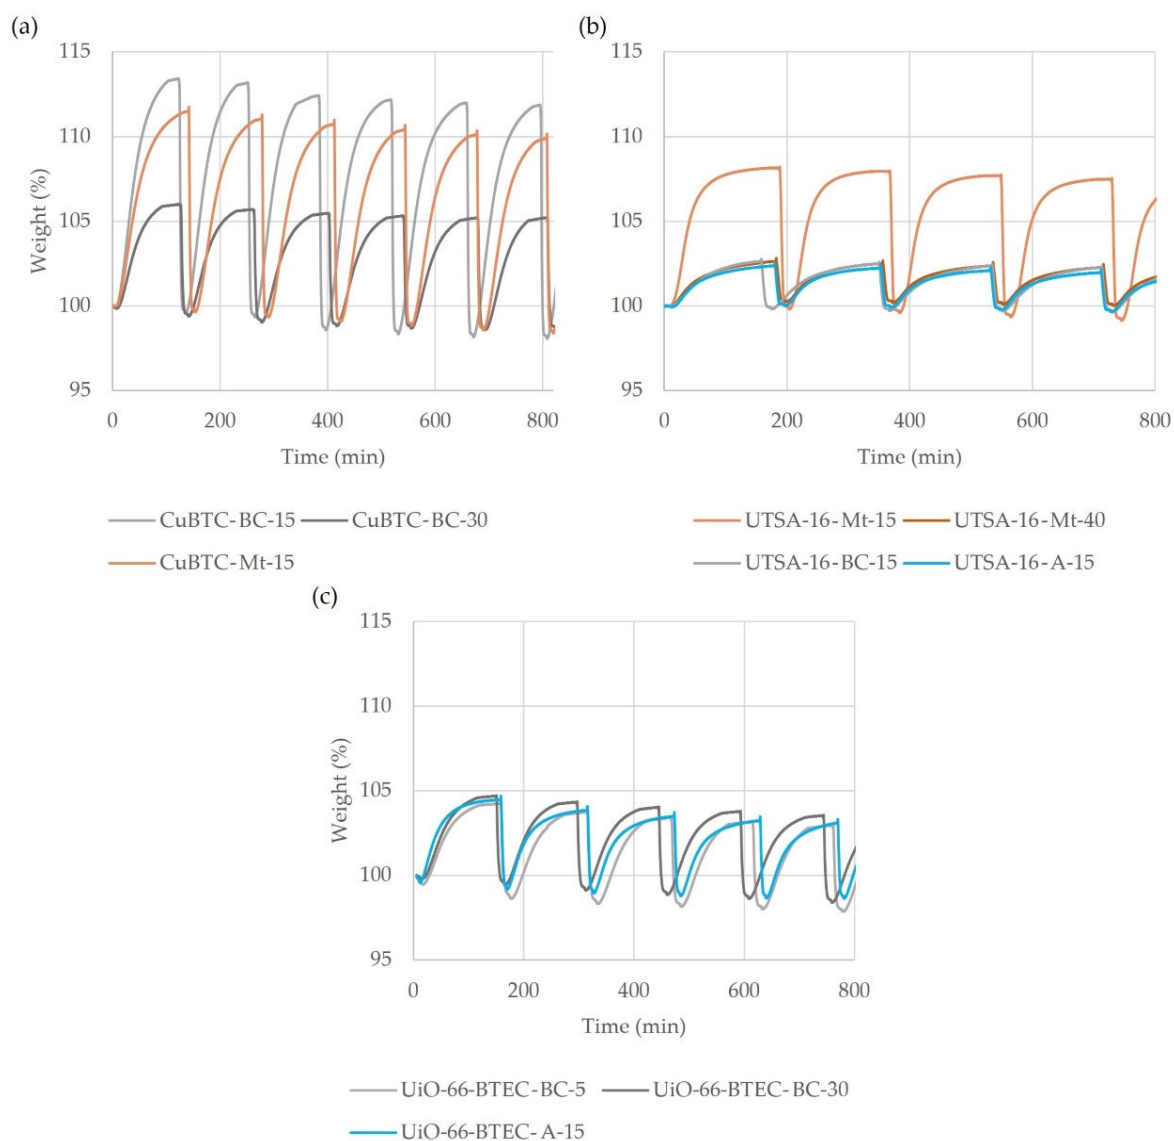

**Figure S6.** CO<sub>2</sub> sorption and desorption cycles of MOF-composites: a) CuBTC-composites; b) UTSA-16-composites; c) UiO-66-BTEC-composites.



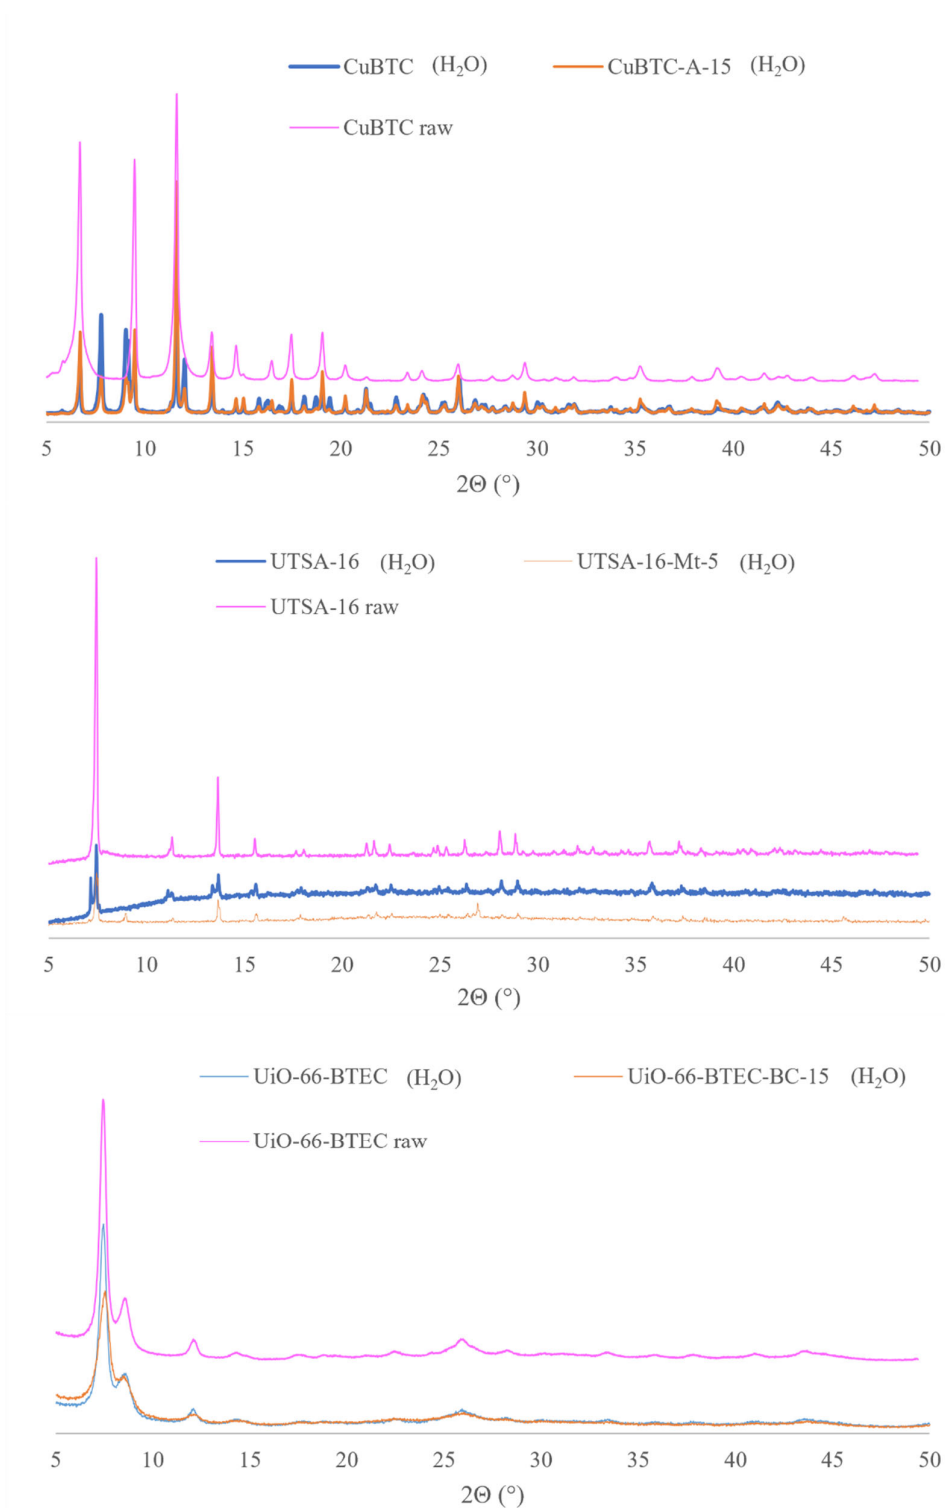

**Figure S7.** PXRD spectra of CuBTC (H<sub>2</sub>O) after exposure to water, raw CuBTC and CuBTC-composite containing aerosil (CuBTC-A-15 (H<sub>2</sub>O)) after exposure to water. PXRD spectra of UTSA-16 (H<sub>2</sub>O) after exposure to water, raw UTSA-16 and UTSA-16-composite containing montmorillonite (UTSA-16-Mt-5 (H<sub>2</sub>O)) after exposure to water. PXRD spectra of UiO-66-BTEC (H<sub>2</sub>O) after exposure to water, raw UiO-66-BTEC and UiO-66-BTEC-composite containing biochar (CuBTC-BC-15 (H<sub>2</sub>O)) after exposure to water.
